# Supplementary material for: Fabrication of eco-friendly nanofibrous membranes functionalized with carboxymethyl-β-cyclodextrin for efficient removal of methylene blue with good recyclability
Source: Royal Society of Chemistry journal article supplement (doi:10.1039/c8ra07523a), 2018-01-01
Supplement: c8ra07523a1.pdf [file c8ra07523a1.pdf]

**Fabrication of eco-friendly nanofibrous membranes functionalized with  
carboxymethyl- $\beta$ -cyclodextrin for efficient removal of methylene blue with good  
recyclability**

Yinli Liu,<sup>ab</sup> Dequn Wu,<sup>\*ab</sup> Xueli Wang,<sup>c</sup> Jianyong Yu,<sup>c</sup> Faxue Li<sup>\*ab</sup>

<sup>a</sup>Key Laboratory of Textile Science & Technology, Ministry of Education, Donghua University, Shanghai 201620, China.

<sup>b</sup>College of Textiles, Donghua University, Shanghai 201620, China.

<sup>c</sup>Innovation center for textile science and technology, Donghua University, Shanghai 201620, China

Corresponding author email address: [dqwu@dhu.edu.cn](mailto:dqwu@dhu.edu.cn) or [fxlee@dhu.edu.cn](mailto:fxlee@dhu.edu.cn)

**Table S1** Average diameters and contact angles of PBST, PBSST and PBSST-*g*- $\beta$ -CD nanofibrous membranes

| Sample                          | Average diameter (nm) | Contact angle (°) |
|---------------------------------|-----------------------|-------------------|
| PBST                            | 653 $\pm$ 2           | 135               |
| PBSST5                          | 623 $\pm$ 3           | 126               |
| PBSST7                          | 601 $\pm$ 4           | 121               |
| PBSST10                         | 579 $\pm$ 4           | 115               |
| PBSST20                         | 558 $\pm$ 3           | 102               |
| PBSST5- <i>g</i> - $\beta$ -CD  | 526 $\pm$ 2           | 98                |
| PBSST7- <i>g</i> - $\beta$ -CD  | 522 $\pm$ 2           | 86                |
| PBSST10- <i>g</i> - $\beta$ -CD | 486 $\pm$ 3           | 69                |
| PBSST20- <i>g</i> - $\beta$ -CD | 469 $\pm$ 3           | 46                |

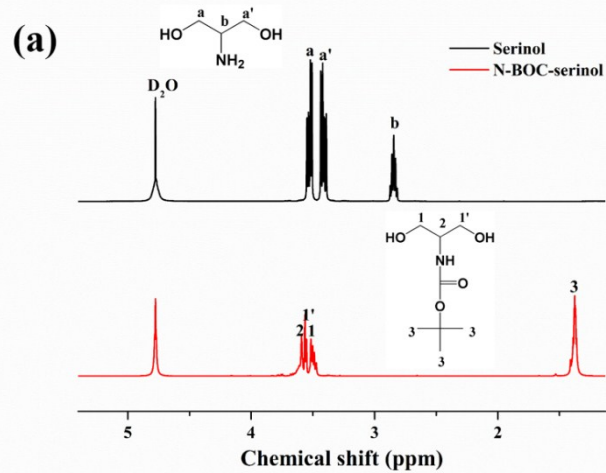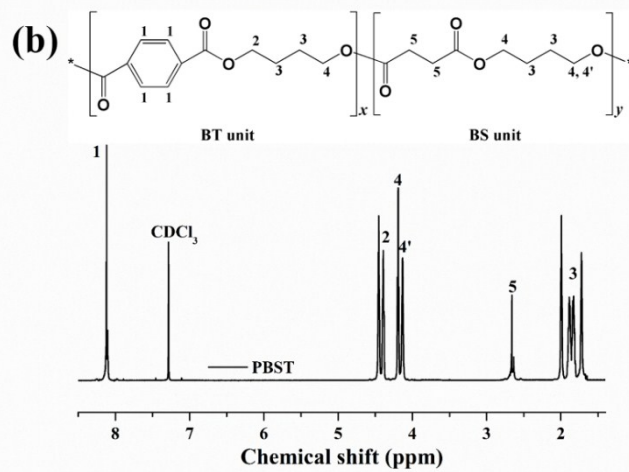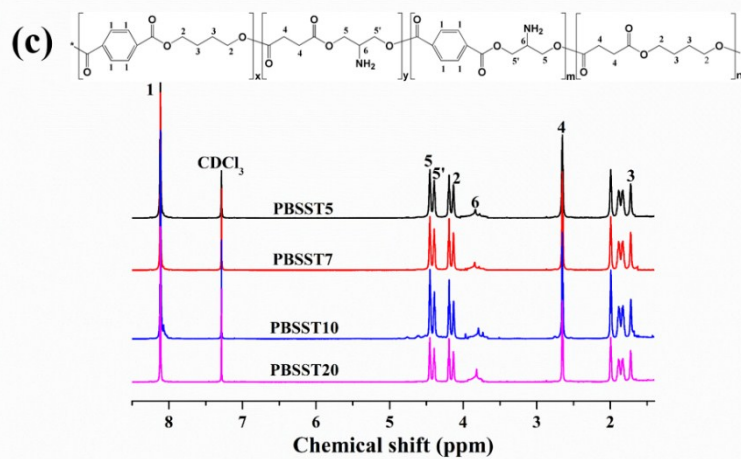

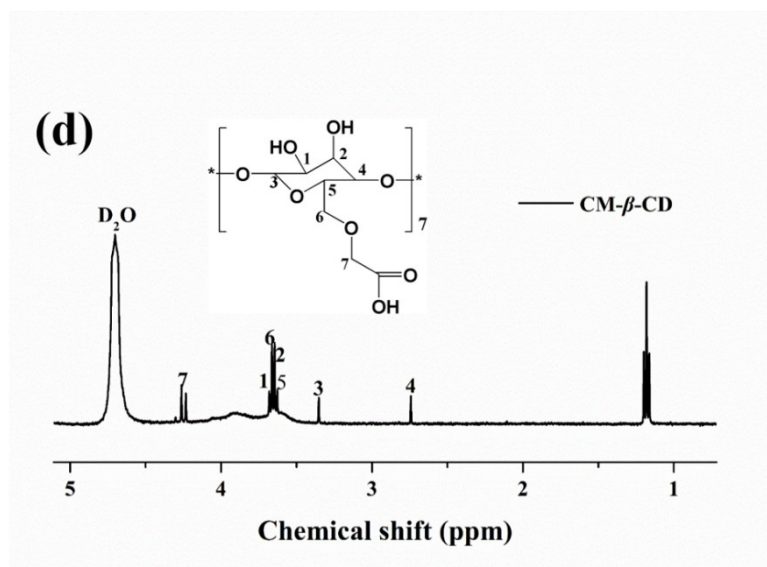

**Fig. S1**  $^1\text{H}$  NMR spectra of serinol and N-BOC-serinol (a), PBST (b), PBSST5, PBSST7, PBSST10, PBSST20 (c), CM- $\beta$ -CD (d).

**Table S2** Adsorption capacity of PBSST20-*g*- $\beta$ -CD nanofibrous membrane to MB at different adsorption times

| Time (min)           | 0  | 2    | 5    | 10   | 15   | 20   | 40   | 60   | 120  |
|----------------------|----|------|------|------|------|------|------|------|------|
| Maximum <sup>a</sup> | 10 | 10   | 10   | 10   | 10   | 10   | 10   | 10   | 10   |
| $q_t$ (mg/g)         | 0  | 5.88 | 7.35 | 8.85 | 8.93 | 9.76 | 9.96 | 9.98 | 9.99 |
| $R_t$ (%)            | 0  | 58.8 | 73.5 | 88.5 | 89.3 | 97.6 | 99.6 | 99.8 | 99.9 |

<sup>a</sup> The maximum adsorption capacity in theory

**Table S3** Adsorption performance of PBSST20-*g*- $\beta$ -CD nanofibrous membrane to MB solution with different initial concentrations

| Initials concentration<br>(mg/L) | 5     | 10    | 20    | 40    | 50    | 100   | 200    |
|----------------------------------|-------|-------|-------|-------|-------|-------|--------|
| Maximum <sup>a</sup> (mg/g)      | 5     | 10    | 20    | 40    | 50    | 100   | 200    |
| $C_e$ <sup>b</sup> (mg/L)        | 0.053 | 0.107 | 0.22  | 0.46  | 0.58  | 1.28  | 3.28   |
| $q_t$ (mg/g)                     | 4.947 | 9.893 | 19.78 | 39.54 | 49.42 | 98.72 | 196.72 |
| $R_t$ (%)                        | 98.94 | 98.93 | 98.90 | 98.85 | 98.84 | 98.72 | 98.36  |

<sup>a</sup> The maximum adsorption capacity in theory; <sup>b</sup> MB solution concentration after adsorption for 12 h.

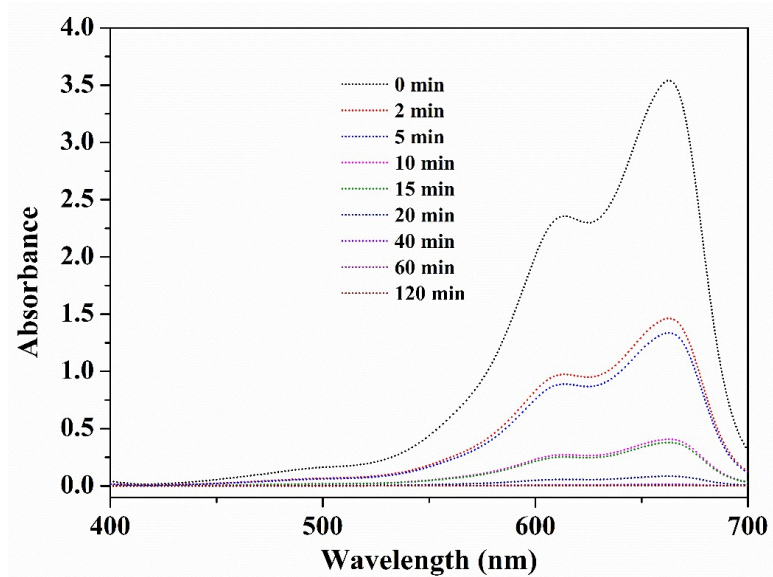

**Fig. S2** UV-vis spectra of MB solution adsorbed by PBSST20-*g*-β-CD nanofibrous membrane at different time intervals.

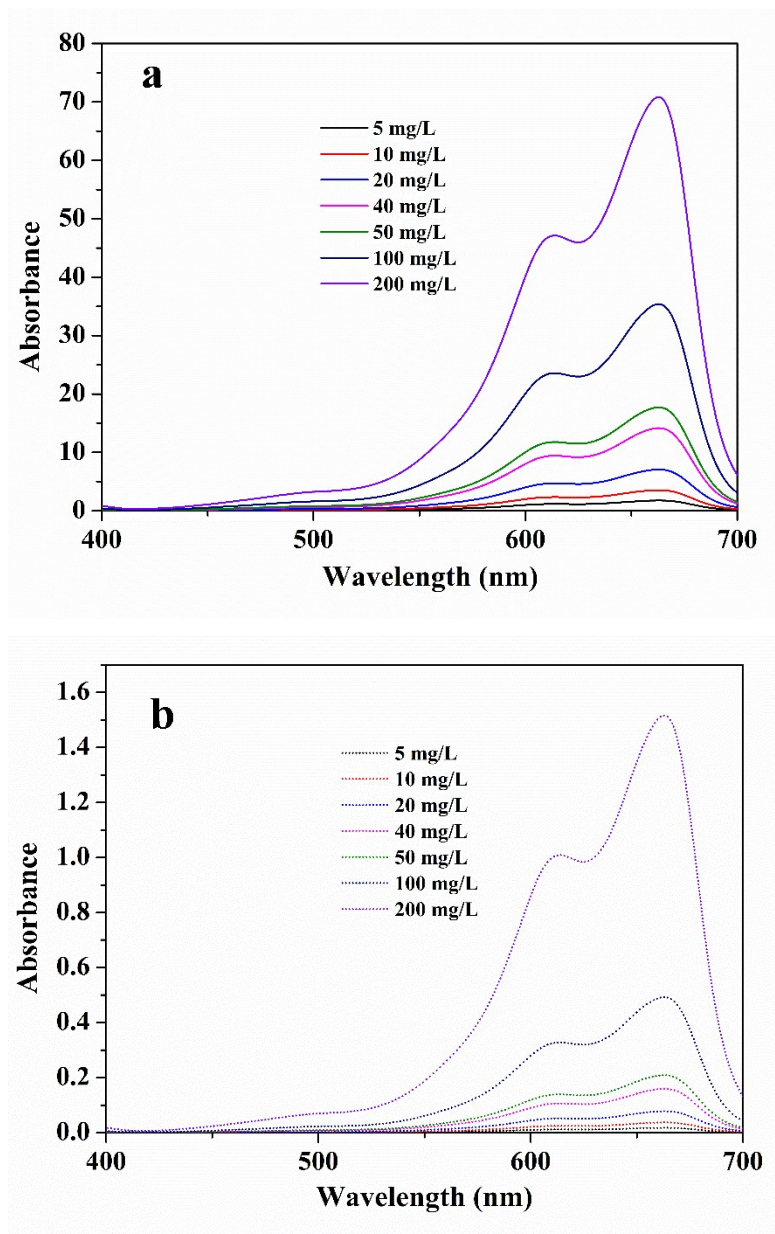

**Fig. S3** UV-vis spectra of MB solution adsorbed by PBSST20-*g*- $\beta$ -CD nanofibrous membrane with different initial concentrations: (a) before adsorption, (b) after adsorption for 12 h.
